# Supplementary material for: UV degradation of the interface between perovskites and the electron transport layer
Source: Royal Society of Chemistry journal article supplement (doi:10.1039/c9ra10960a), 2020-01-01
Supplement: c9ra10960a1.pdf [file c9ra10960a1.pdf]

## Supporting Information

# UV Degradation of the Interface between Perovskite and Electron Transport Layer

Ranran Liu,<sup>ab</sup> Li Wang,<sup>\*a</sup> Yingping Fan,<sup>ab</sup> Zhipeng Li,<sup>b</sup> and Shuping Pang<sup>b</sup>

[a] Qingdao University of Science and Technology, College of Materials Science and Engineering

Qingdao 266042, P.R. China. Email: liwang718@qust.edu.cn

[b] Qingdao Institute of Bioenergy and Bioprocess Technology, Chinese Academy of Sciences,

Qingdao 266101, P.R. China.

---

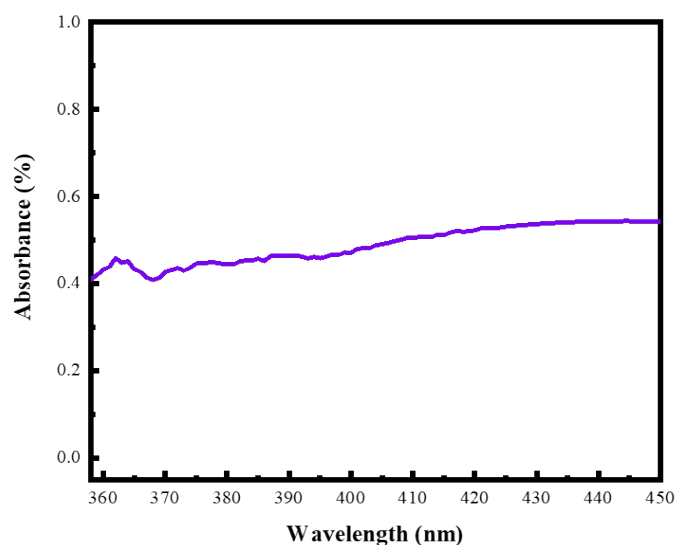

Figure S1 The optical absorbance spectra of FTO coated glass were measured by UV-vis/NIR spectrophotometer and its absorption coefficient at 365nm is 0.42. About 60 percent of ultraviolet light intensity can be transmitted and reach ETL.

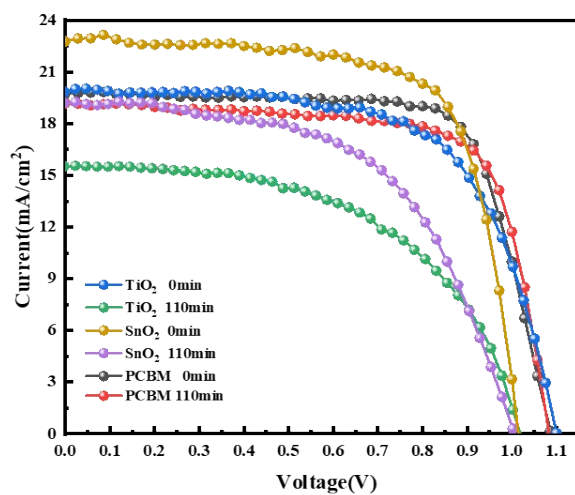

Figure S2 The typical  $J-V$  curves of the devices based on different ETLs before and after UV treatment.

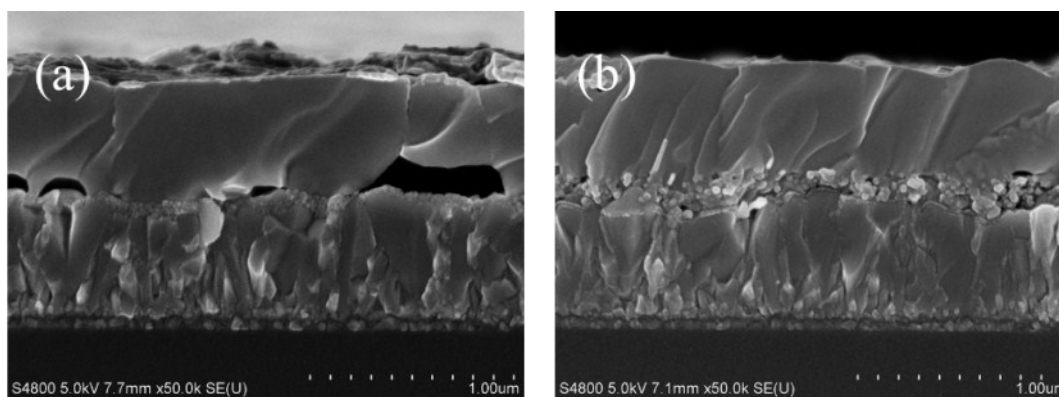

Figure S3 The cross-sectional SEM images of perovskite films based on (a) planar  $\text{SnO}_2$ , (b) mp- $\text{SnO}_2$  after 110 min UV exposure, respectively.

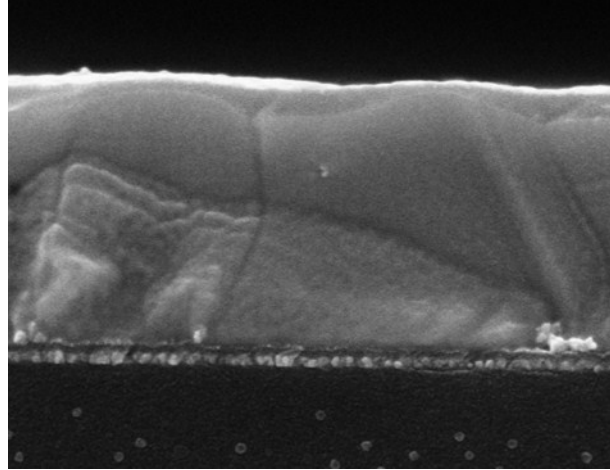

Figure S4 The cross-sectional SEM images of perovskite films based on PCBM after 110min UV treatment and the UV illumination was from the PCBM side. The morphology of PCBM/perovskite interface is stable which shows a similar effect as illumination from FTO side.

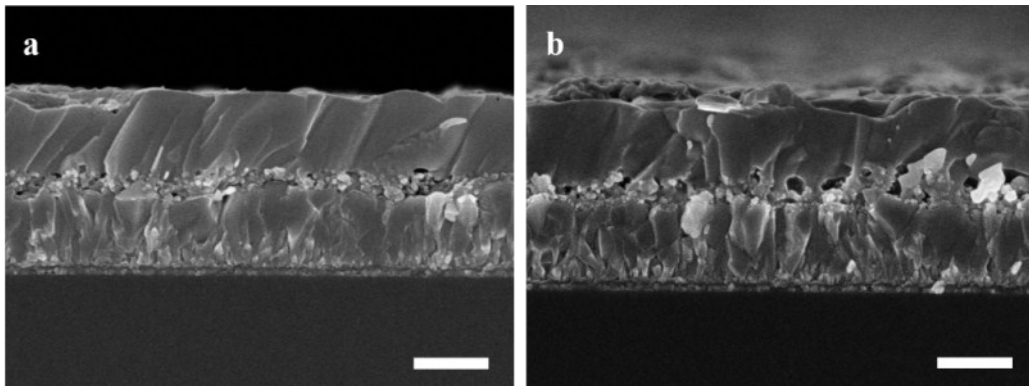

Figure S5 The cross-sectional SEM images of perovskite layers deposited on (a) mp-SnO<sub>2</sub>, (b) mp-TiO<sub>2</sub> after 110min UV illumination in an open environment with a humidity of about 40%. The interface of mp-SnO<sub>2</sub>/ perovskite or mp-TiO<sub>2</sub>/perovskite is more serious than that in a nitrogen glove box.

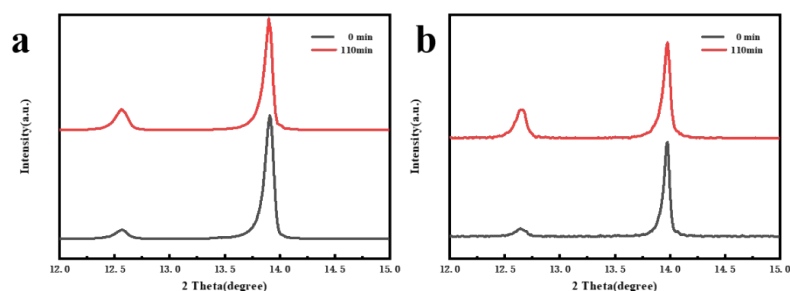

Figure S6 X-ray diffraction patterns of (a) mp-SnO<sub>2</sub>, (b) mp-TiO<sub>2</sub> based perovskite film after 110min UV irradiation in an open environment with a humidity of about 40%. The intensity of PbI<sub>2</sub> diffraction peak increased significantly which indicates the stronger photocatalysis of TiO<sub>2</sub> and SnO<sub>2</sub> than that in N<sub>2</sub> atmosphere.

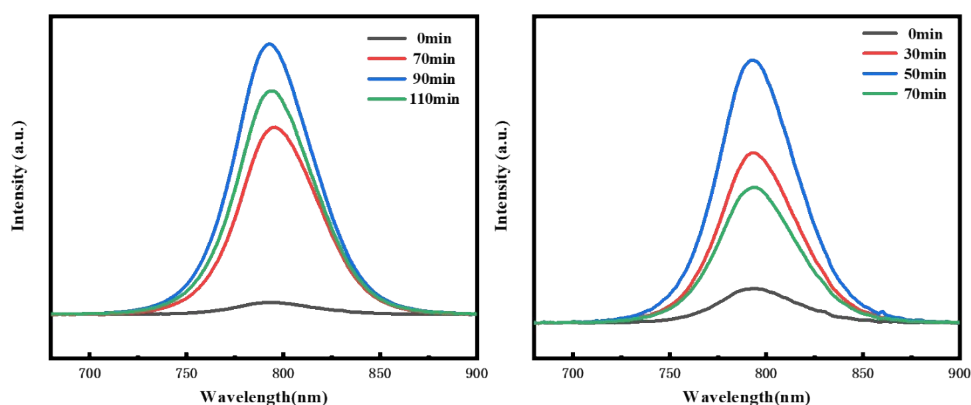

Figure S7 Steady-state photoluminescence (PL) spectra of perovskite film based on (a) mp-TiO<sub>2</sub>, (b) mp-SnO<sub>2</sub>. The 450nm laser is incident from the perovskite film surface. Compared with the laser from the glass side, the PL intensity of perovskite films deposited on mp-TiO<sub>2</sub> or mp-SnO<sub>2</sub> also shows the trend of increasing first and then decreasing with the extension of UV treatment time.

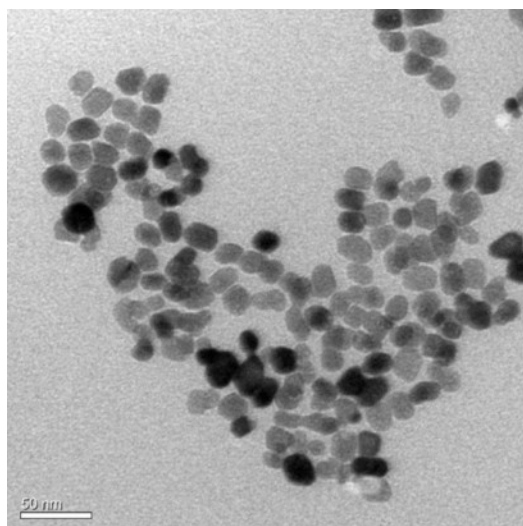

Figure S8 TEM image of SnO<sub>2</sub> nanoparticles (NPs). The grain size of the nanoparticles is approximately 20 nm and the SnO<sub>2</sub> NPs were uniformly dispersed and there was no agglomeration.

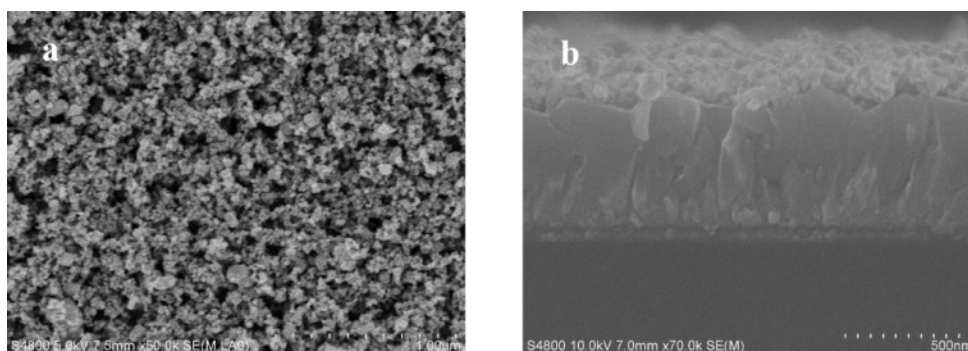

Figure S9 (a) Surface SEM image of SnO<sub>2</sub> nanoparticles. (b) Cross-sectional SEM images of SnO<sub>2</sub> NPs deposited on FTO. The thickness of mesoporous (mp) SnO<sub>2</sub> layer is about 150 nm.
